# Supplementary material for: Lanthanide-doped Sr2ScF7 nanocrystals: controllable hydrothermal synthesis, the growth mechanism and tunable up/down conversion luminescence properties
Source: Royal Society of Chemistry journal article supplement (doi:10.1039/c6tc05477c), 2017-01-01
Supplement: c6tc05477c1.pdf [file c6tc05477c1.pdf]

# Lanthanide-doped Sr<sub>2</sub>ScF<sub>7</sub> nanocrystals: controllable hydrothermal synthesis, growing mechanism and tunable up/down conversion luminescence properties

Bei Zhao,<sup>a</sup> Dingyi Shen,<sup>a</sup> Jun Yang,<sup>\*a</sup> Shanshan Hu,<sup>a</sup> Xianju Zhou<sup>b</sup> and Jianfeng Tang<sup>c</sup>

<sup>a</sup>*School of Chemistry and Chemical Engineering, Southwest University, Chongqing 400715, China.* <sup>b</sup>*School of Mathematics and Physics, Chongqing University of Posts and Telecommunications, Chongqing 400065, China.*

<sup>c</sup>*Faculty of Materials and Energy, Southwest University, Chongqing 400715, China.*

**Table S1** Crystallographic data for Sr<sub>2</sub>ScF<sub>7</sub>.

|                                                               |                                  |
|---------------------------------------------------------------|----------------------------------|
| Formula                                                       | Sr <sub>2</sub> ScF <sub>7</sub> |
| Formula weight                                                | 353.18                           |
| Crystal system                                                | monoclinic                       |
| Space group                                                   | P21/c (#14)                      |
| a/Å                                                           | 5.450                            |
| b/Å                                                           | 12.190                           |
| c/Å                                                           | 8.236                            |
| α/°                                                           | 90                               |
| β/°                                                           | 89.53                            |
| γ/°                                                           | 90                               |
| V/Å <sup>3</sup>                                              | 547.1                            |
| Z                                                             | 4                                |
| ρ <sub>calc</sub> /gcm <sup>-3</sup>                          | 4.287                            |
| μ/cm <sup>-1</sup>                                            | 201.32                           |
| Sinθ <sub>max</sub> /λ                                        | 0.8071                           |
| R <sub>int</sub>                                              | 0.051                            |
| R <sub>w</sub> (F <sub>0</sub> )                              | 0.048                            |
| R(F <sub>0</sub> ) for F <sub>02</sub> > 3σ(F <sub>02</sub> ) | 0.045                            |

**Table S2** Length and diameter of the obtained products from the SEM images in Fig. 2.

| doped Ln <sup>3+</sup> (30%) | Length (nm) | Width (nm) |
|------------------------------|-------------|------------|
| no                           | 120         | 50         |
| Lu                           | 80          | 40         |
| Yb                           | 50          | 38         |
| Tm                           | 35          | 30         |
| Dy                           | 33          | 29         |
| Tb                           | 31          | 26         |
| Eu                           | 24          | 23         |
| Sm                           | 20          | 20         |
| La                           | 15          | 15         |

**Table S3** Summary of the photoluminescence properties of Sr<sub>2</sub>ScF<sub>7</sub>:Ln<sup>3+</sup> (Ln = Ce, Tb, Eu, Sm, Dy, Er, Ho, and Tm) nanocrystals.

|                                                      | Excitation<br>peaks(nm)/transition                                                                                                                                                                                                                                                                                                                                   | Emission<br>peaks(nm)/transition                                                                                                               |                                                       | Excitation<br>peaks(nm)/transition                                                                                                                                                                                 | Emission<br>peaks(nm)/transition                                                                                                                                                                                                                                     |
|------------------------------------------------------|----------------------------------------------------------------------------------------------------------------------------------------------------------------------------------------------------------------------------------------------------------------------------------------------------------------------------------------------------------------------|------------------------------------------------------------------------------------------------------------------------------------------------|-------------------------------------------------------|--------------------------------------------------------------------------------------------------------------------------------------------------------------------------------------------------------------------|----------------------------------------------------------------------------------------------------------------------------------------------------------------------------------------------------------------------------------------------------------------------|
| Sr <sub>2</sub> ScF <sub>7</sub> :6%Ce <sup>3+</sup> | 259,294/4f-5d                                                                                                                                                                                                                                                                                                                                                        | 354/5d-4f                                                                                                                                      | Sr <sub>2</sub> ScF <sub>7</sub> :12%Tb <sup>3+</sup> | 222,265,284,351,<br>367/4f <sub>8</sub> -4f <sub>7</sub> 5d <sup>1</sup>                                                                                                                                           | 489/ <sup>5</sup> D <sub>4</sub> - <sup>7</sup> F <sub>6</sub><br>546/ <sup>5</sup> D <sub>4</sub> - <sup>7</sup> F <sub>5</sub><br>586/ <sup>5</sup> D <sub>4</sub> - <sup>7</sup> F <sub>4</sub><br>624/ <sup>5</sup> D <sub>4</sub> - <sup>7</sup> F <sub>3</sub> |
| Sr <sub>2</sub> ScF <sub>7</sub> :9%Eu <sup>3+</sup> | 328/ <sup>7</sup> F <sub>0</sub> - <sup>5</sup> H <sub>6</sub><br>362/ <sup>7</sup> F <sub>0</sub> - <sup>5</sup> D <sub>4</sub><br>381/ <sup>7</sup> F <sub>0</sub> - <sup>5</sup> G <sub>2</sub><br>394/ <sup>7</sup> F <sub>0</sub> - <sup>5</sup> L <sub>6</sub><br>465/ <sup>7</sup> F <sub>0</sub> - <sup>5</sup> D <sub>2</sub>                               | 594/ <sup>5</sup> D <sub>0</sub> - <sup>7</sup> F <sub>1</sub><br>619/ <sup>5</sup> D <sub>0</sub> - <sup>7</sup> F <sub>2</sub>               | Sr <sub>2</sub> ScF <sub>7</sub> :1%Sm <sup>3+</sup>  | 359/ <sup>6</sup> H <sub>5/2</sub> - <sup>4</sup> K <sub>17/2</sub><br>372/ <sup>6</sup> H <sub>5/2</sub> - <sup>4</sup> D <sub>15/2</sub><br>399/ <sup>6</sup> H <sub>5/2</sub> - <sup>4</sup> K <sub>11/2</sub>  | 562/ <sup>4</sup> G <sub>5/2</sub> - <sup>6</sup> H <sub>5/2</sub><br>603/ <sup>4</sup> G <sub>5/2</sub> - <sup>6</sup> H <sub>7/2</sub><br>651/ <sup>4</sup> G <sub>5/2</sub> - <sup>6</sup> H <sub>9/2</sub>                                                       |
| Sr <sub>2</sub> ScF <sub>7</sub> :1%Dy <sup>3+</sup> | 294/ <sup>6</sup> H <sub>5/2</sub> - <sup>4</sup> D <sub>7/2</sub><br>324/ <sup>6</sup> H <sub>5/2</sub> - <sup>6</sup> P <sub>3/2</sub><br>348/ <sup>6</sup> H <sub>5/2</sub> - <sup>6</sup> P <sub>7/2</sub><br>364/ <sup>6</sup> H <sub>5/2</sub> - <sup>6</sup> P <sub>7/2</sub><br>384/ <sup>6</sup> H <sub>5/2</sub> - <sup>4</sup> M <sub>21/2</sub>          | 482,492/ <sup>4</sup> F <sub>9/2</sub> - <sup>6</sup> H <sub>15/2</sub><br>577/ <sup>4</sup> F <sub>9/2</sub> - <sup>6</sup> H <sub>13/2</sub> | Sr <sub>2</sub> ScF <sub>7</sub> :1%Er <sup>3+</sup>  | 364/ <sup>4</sup> I <sub>15/2</sub> - <sup>4</sup> G <sub>7/2</sub><br>378/ <sup>4</sup> I <sub>15/2</sub> - <sup>4</sup> G <sub>11/2</sub><br>405/ <sup>4</sup> I <sub>15/2</sub> - <sup>2</sup> H <sub>9/2</sub> | 524/ <sup>2</sup> H <sub>11/2</sub> - <sup>4</sup> I <sub>15/2</sub><br>547,558/ <sup>4</sup> S <sub>3/2</sub> - <sup>4</sup> I <sub>15/2</sub>                                                                                                                      |
| Sr <sub>2</sub> ScF <sub>7</sub> :2%Ho <sup>3+</sup> | 361/ <sup>5</sup> I <sub>8</sub> - <sup>5</sup> G <sub>2</sub><br>384/ <sup>5</sup> I <sub>8</sub> - <sup>5</sup> G <sub>4</sub><br>417/ <sup>5</sup> I <sub>8</sub> - <sup>5</sup> G <sub>5</sub><br>452/ <sup>5</sup> I <sub>8</sub> - <sup>5</sup> F <sub>1</sub> , <sup>5</sup> G <sub>6</sub><br>485/ <sup>5</sup> I <sub>8</sub> - <sup>5</sup> G <sub>2</sub> | 540,548/ <sup>5</sup> F <sub>4</sub> , <sup>5</sup> S <sub>2</sub> - <sup>5</sup> I <sub>8</sub>                                               | Sr <sub>2</sub> ScF <sub>7</sub> :2%Er <sup>3+</sup>  | 357/ <sup>3</sup> H <sub>6</sub> - <sup>1</sup> D <sub>2</sub>                                                                                                                                                     | 451/ <sup>1</sup> D <sub>2</sub> - <sup>3</sup> F <sub>4</sub>                                                                                                                                                                                                       |

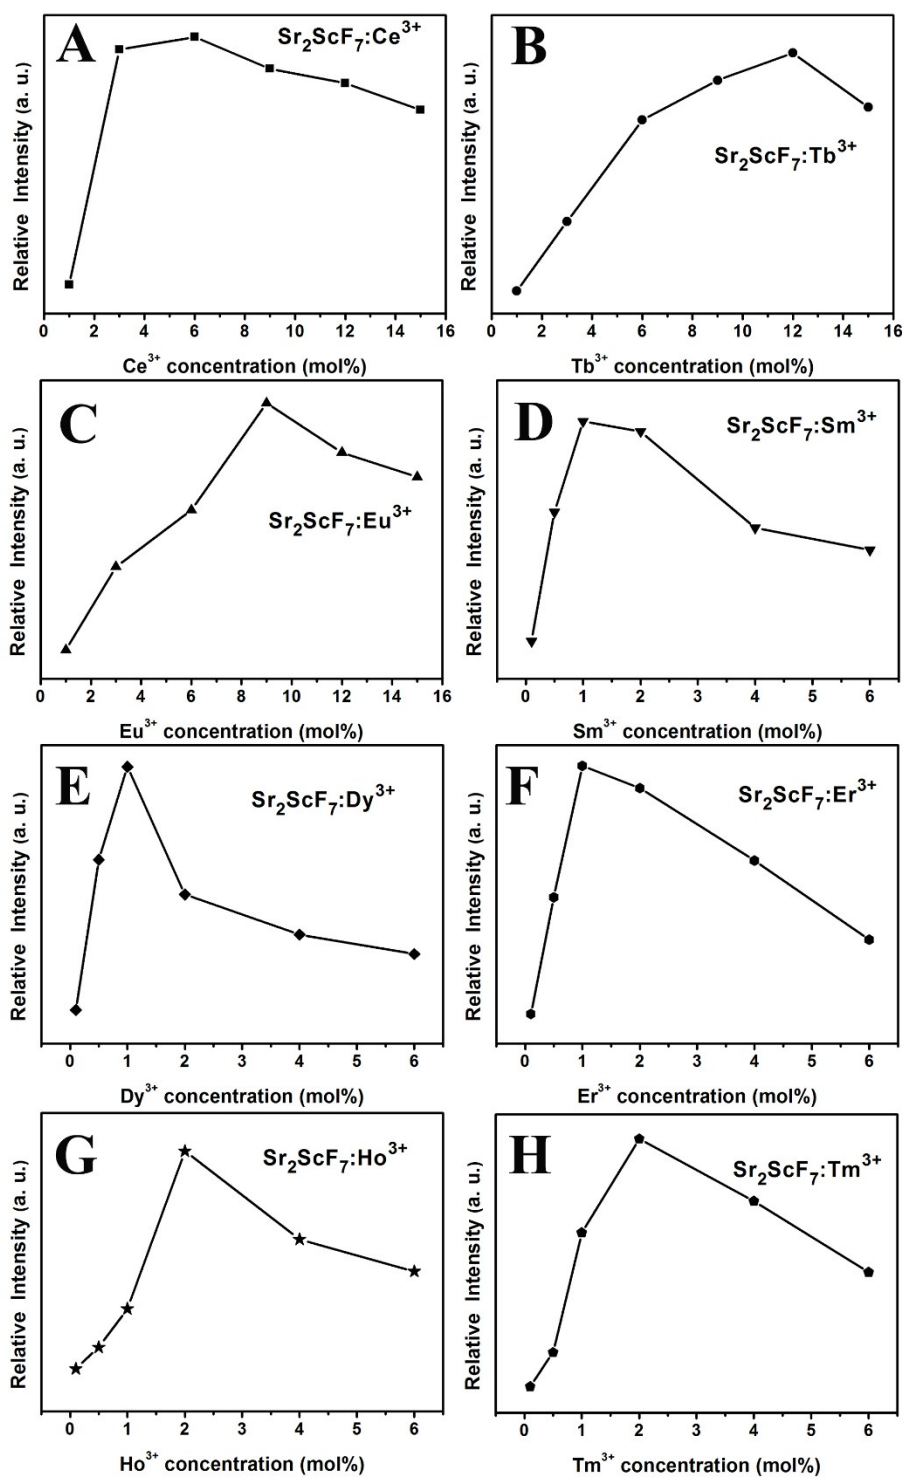

**Fig. S1** The photoluminescence emission intensity of Ln<sup>3+</sup> ions as a function of their doping concentrations in Sr<sub>2</sub>ScF<sub>7</sub> nanocrystals, respectively. The optimum concentrations of Ln<sup>3+</sup> are determined to be as 6% (Ce<sup>3+</sup>), 12% (Tb<sup>3+</sup>), 9% (Eu<sup>3+</sup>), 1% (Sm<sup>3+</sup>), 1% (Dy<sup>3+</sup>), 1.0 (Er<sup>3+</sup>), 2% (Ho<sup>3+</sup>), 2% (Tm<sup>3+</sup>), respectively.

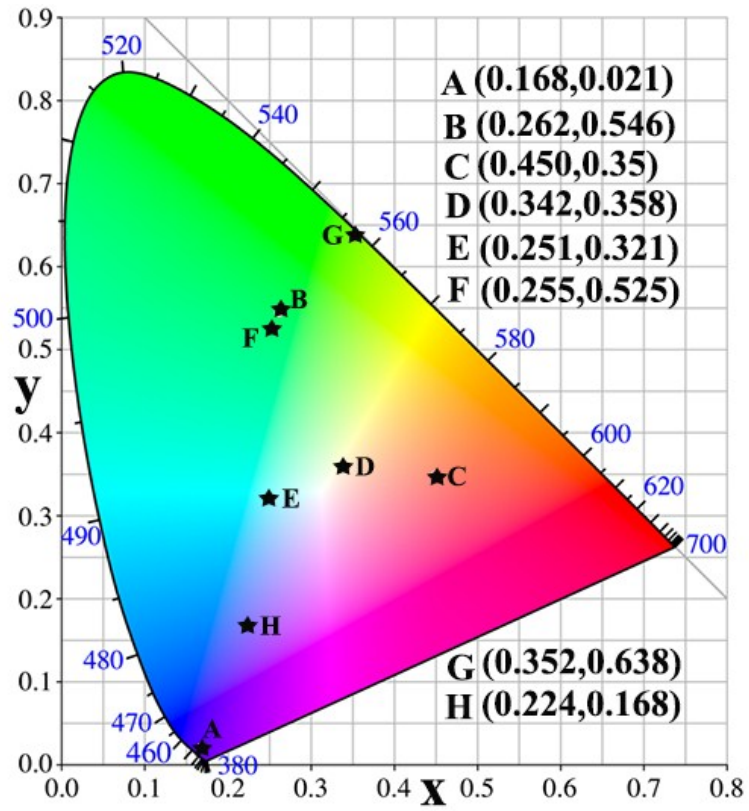

**Fig. S2** The CIE chromaticity coordinates of  $\text{Sr}_2\text{ScF}_7$ : (A) 6%  $\text{Ce}^{3+}$ , (B) 12%  $\text{Tb}^{3+}$ , (C) 9%  $\text{Eu}^{3+}$ , (D) 1%  $\text{Sm}^{3+}$ , (E) 1%  $\text{Dy}^{3+}$ , (F) 1%  $\text{Er}^{3+}$ , (G) 2%  $\text{Ho}^{3+}$ , (H) 2%  $\text{Tm}^{3+}$ , respectively.

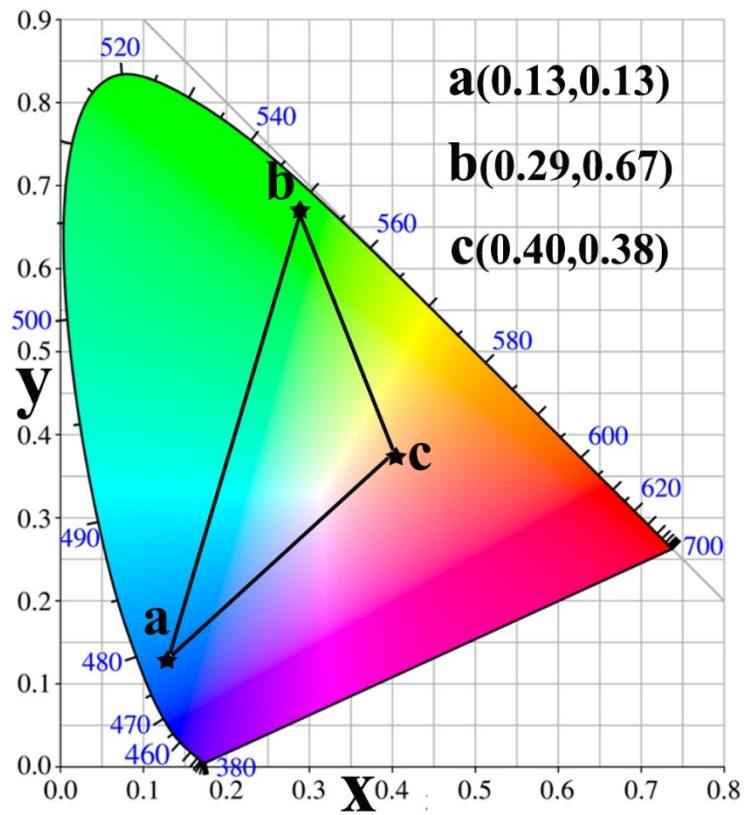

**Fig. S3** The CIE chromaticity coordinates of (a)  $\text{Sr}_2\text{ScF}_7:10\%\text{Yb}^{3+}, 2\%\text{Tm}^{3+}$ , (b)  $\text{Sr}_2\text{ScF}_7:1\%\text{Er}^{3+}$ , (c)  $\text{Sr}_2\text{ScF}_7:10\%\text{Yb}^{3+}, 1\%\text{Er}^{3+}$  nanocrystals.

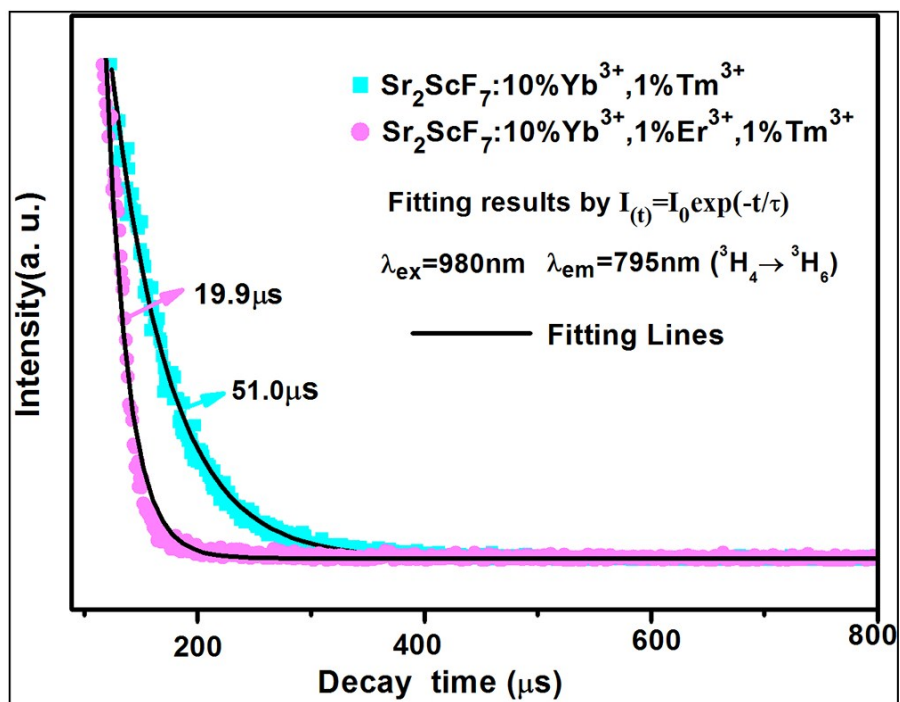

**Fig. S4** The decay curves of  ${}^3\text{H}_4 \rightarrow {}^3\text{H}_6$  of  $\text{Tm}^{3+}$  in the  $\text{Sr}_2\text{ScF}_7:10\%\text{Yb}^{3+},1\%\text{Tm}^{3+}$  and  $\text{Sr}_2\text{ScF}_7:10\%\text{Yb}^{3+},1\%\text{Er}^{3+},1\%\text{Tm}^{3+}$  nanocrystals.
